1 **Title**

2 *De Novo* Assembly of the Northern Cardinal (*Cardinalis cardinalis*) Genome Reveals  
3 Candidate Regulatory Regions for Sexually Dichromatic Red Plumage Coloration

4

5 **Author**

6 Simon Yung Wa Sin †‡\*, Lily Lu †, Scott V. Edwards †

7

8 **Author affiliation**

9 † Department of Organismic and Evolutionary Biology, Museum of Comparative Zoology,  
10 Harvard University, 26 Oxford Street, Cambridge, MA 02138, USA.

11 ‡ School of Biological Sciences, The University of Hong Kong, Pok Fu Lam Road, Hong  
12 Kong.

13

14

15 **Running title**

16 Northern cardinal genome assembly

17

18 **Keywords**

19 AllPaths-LG

20 *Cis*-regulatory elements

21 CYP2J19 gene

22 Ketocarotenoid pigments

23 Transcription factors

24

25 **\* Corresponding author**

26 Simon Y. W. Sin

27 Email: [yungwa.sin@gmail.com](mailto:yungwa.sin@gmail.com)

28 Mailing address: School of Biological Sciences, Kadoorie Biological Sciences Building, The

29 University of Hong Kong, Pok Fu Lam Road, Hong Kong.

30

## 31 **Abstract**

32 Northern cardinals (*Cardinalis cardinalis*) are common, mid-sized passerines widely  
33 distributed in North America. As an iconic species with strong sexual dichromatism, it has  
34 been the focus of extensive ecological and evolutionary research, yet genomic studies  
35 investigating the evolution of genotype–phenotype association of plumage coloration and  
36 dichromatism are lacking. Here we present a new, highly contiguous assembly for *C.*  
37 *cardinalis*. We generated a 1.1 Gb assembly comprised of 4,762 scaffolds, with a scaffold  
38 N50 of 3.6 Mb, a contig N50 of 114.4 kb and a longest scaffold of 19.7 Mb. We identified  
39 93.5% complete and single-copy orthologs from an Aves dataset using BUSCO,  
40 demonstrating high completeness of the genome assembly. We annotated the genomic region  
41 comprising the CYP2J19 gene, which plays a pivotal role in the red coloration in birds.  
42 Comparative analyses demonstrated non-exonic regions unique to the CYP2J19 gene in  
43 passerines and a long insertion upstream of the gene in *C. cardinalis*. Transcription factor  
44 binding motifs discovered in the unique insertion region in *C. cardinalis* suggest potential  
45 androgen-regulated mechanisms underlying sexual dichromatism. Pairwise Sequential  
46 Markovian Coalescent (PSMC) analysis of the genome reveals fluctuations in historic  
47 effective population size between 100,000–250,000 in the last 2 millions years, with declines  
48 concordant with the beginning of the Pleistocene epoch and Last Glacial Period. This draft  
49 genome of *C. cardinalis* provides an important resource for future studies of ecological,  
50 evolutionary, and functional genomics in cardinals and other birds.

51

## 52 **Introduction**

53 The northern cardinal (*Cardinalis cardinalis*) is a mid-sized (~42-48 g) passerine broadly  
54 distributed in eastern and central North America, with a range encompassing northern Central  
55 America to southeastern Canada (Smith et al. 2011). It has high genetic and phenotypic

56 diversity and is currently divided into 18 subspecies (Paynter 1970; Smith et al. 2011).  
57 Cardinals have been studied extensively on research areas such as song and communication  
58 (e.g. Anderson and Conner 1985; Yamaguchi 1998; Jawor and MacDougall-Shackleton  
59 2008), sexual selection (e.g. Jawor et al. 2003), physiology (e.g. DeVries and Jawor 2013;  
60 Wright and Fokidis 2016), phylogeography (e.g. Smith et al. 2011), and plumage coloration  
61 (e.g. Linville and Breitwisch 1997; Linville et al. 1998; McGraw et al. 2003). *C. cardinalis* is  
62 an iconic species in Cardinalidae and has strong sexual dichromatism, with adult males  
63 possessing bright red plumage and adult females tan (Fig. 1).

64         The red plumage coloration of many bird species plays important roles in social and  
65 sexual signaling. With the advance of genomic technologies in the last several years, the  
66 genetic basis and evolution of plumage coloration in birds is under intense investigation  
67 (Lopes et al. 2016; Mundy et al. 2016; Twyman et al. 2016; Toomey et al. 2018; Twyman et  
68 al. 2018a; Twyman et al. 2018b; Funk and Taylor 2019; Kim et al. 2019; Gazda et al. 2020).  
69 The red color of feathers is generated by the deposition of ingested carotenoids, modified  
70 endogenously. A ketolase is involved in an oxidative reaction to convert dietary yellow  
71 carotenoids into red ketocarotenoids (Friedman et al. 2014). Recently the gene encoding the  
72 carotenoid ketolase has been shown to be a cytochrome P450 enzyme, CYP2J19 (Lopes et al.  
73 2016; Mundy et al. 2016). The identification of CYP2J19 as the gene responsible for red  
74 coloration in hybrid canary (*Serinus canaria*) plumage (Lopes et al. 2016) and zebra finch  
75 (*Taeniopygia guttata*) bill and legs (Mundy et al. 2016) suggests its general role in red  
76 pigmentation of multiple tissues across birds. *C. cardinalis* is an excellent candidate to  
77 further our understanding of the regulation and development of red plumage coloration in  
78 birds. In particular, little attention has been paid to noncoding, regulatory signatures in the  
79 region surrounding CYP2J19, and genomic resources for cardinals would greatly facilitate  
80 such work.

81           Despite extensive ecological and evolutionary research on *C. cardinalis*, we lack a  
82 highly contiguous genome of this species and other species in the family Cardinalidae. A  
83 genome assembly of *C. cardinalis* will facilitate studies of genotype–phenotype association  
84 of sexually dichromatic plumage color in this species, and facilitate comparative genomic  
85 analysis in birds generally. Here we generate a new genome assembly from a male collected  
86 in Texas, USA, with a voucher specimen in the ornithology collection of the Museum of  
87 Comparative Zoology. We used the AllPaths-LG (Gnerre et al. 2011) method to perform *de*  
88 *novo* genome assembly. Given the lack of genomic resources currently available for the  
89 Cardinalidae, this *C. cardinalis* draft genome will facilitate future studies on genomic studies  
90 of cardinals and other passerines.

91

## 92 **Methods & Materials**

### 93 **Sample collection and DNA extraction**

94 We collected a male *C. cardinalis* on the DNA Works Ranch, Afton, Dickens County, Texas,  
95 United States (33.76286°, -100.8168°) on 19 January 2016 (MCZ Ornithology cat. no.:  
96 364215). We collected muscle, heart, and liver and snap frozen the tissues in liquid nitrogen  
97 immediately in the field. Upon returning from the field, tissues were stored in the  
98 cryopreservation facility of the Museum of Comparative Zoology, Harvard University until  
99 DNA extraction. We isolated genomic DNA using the DNeasy Blood and Tissue Kit  
100 (Qiagen, Hilden, Germany) following the manufacturer’s protocol. We confirmed the sex of  
101 the individual using published PCR primers targeting CHD1 genes with different sizes of  
102 intron on the W and Z chromosomes (2550F & 2718R; Fridolfsson and Ellegren 1999) and  
103 measured DNA concentration with a Qubit dsDNA HS Assay Kit (Invitrogen, Carlsbad,  
104 USA).

105

## 106 **Library preparation and sequencing**

107 We performed whole-genome library preparation and sequencing following Grayson et al.  
108 (2017). In brief, a DNA fragment library of 220 bp insert size was prepared using the PrepX  
109 ILM 32i DNA Library Kit (Takara), and mate-pair libraries of 3 kb insert size were prepared  
110 using the Nextera Mate Pair Sample Preparation Kit (cat. No. FC-132-1001, Illumina). We  
111 then assessed library quality using the HS DNA Kit (Agilent) and quantified the libraries  
112 with qPCR prior to sequencing (KAPA library quantification kit). We sequenced the libraries  
113 on an Illumina HiSeq instrument (High Output 250 kit, PE 125 bp reads) at the Bauer Core  
114 facility at Harvard University.

115

## 116 **De novo genome assembly and assessment**

117 We assessed the quality of the sequencing data using FastQC and removed adapters using  
118 Trimmomatic (Bolger et al. 2014) and assembled the genome using AllPaths-LG v52488  
119 (Gnerre et al. 2011), which allowed us to estimate the genome size from k-mer frequencies  
120 and assess the contiguity of the *de novo* genome. We estimated the completeness of the  
121 assembled genome with BUSCO v2.0 (Simão et al. 2015) and used the *aves\_odb9* dataset to  
122 search for 4915 universal single-copy orthologs in birds.

123

## 124 **Analysis of the CYP2J19 genomic region**

125 We annotated the genomic region that comprises the CYP2J19 gene using blastn with the  
126 CYP2J19, CYP2J40, HOOK1 and NFIA genes from *S. canaria* and *T. guttata* as queries.  
127 Conserved non-exonic elements (CNEEs) were obtained from a published UCSC Genome  
128 Browser track hub containing a progressiveCactus alignment of 42 bird and reptile species  
129 and CNEE annotations (viewed in the UCSC genome browser at  
130 <https://ifx.rc.fas.harvard.edu/pub/ratiteHub8/hub.txt>; Sackton et al. 2019). We identified

131 CYP2J19 genes from 30 bird species (Twyman et al. 2018a) in the NCBI by blasting their  
132 genome assemblies. The alignment was compiled using MUSCLE (Edgar 2004) and viewed  
133 with Geneious (Kearse et al. 2012). We also aligned the genomic regions up- and  
134 downstream of CYP2J19 in 10 passerines to identify any potential conserved regulatory  
135 regions present in species with red carotenoid coloration.

136 We used the MEME Suite (Bailey et al. 2009; Bailey et al. 2015) to discover potential  
137 regulatory DNA motifs in the region upstream of the CYP2J19 gene that we found to be  
138 unique to *C. cardinalis* and to predict transcription factors (TFs) binding to those motifs. We  
139 used MEME (Bailey and Elkan 1994) to identify the top five most statistically significant  
140 motifs and their corresponding positions in the region. We used Tomtom (Gupta et al. 2007)  
141 to compare the identified motifs against databases (e.g. JASPAR) of known motifs and  
142 identify potential TFs specific to those matched motifs. To search for potential biological  
143 roles of these motifs, we used GOMo (Buske et al. 2010) to scan all promoters in *Gallus*  
144 *gallus* using the identified motifs to determine if any motifs are significantly associated with  
145 genes linked to any Genome Ontology (GO) terms.

146

#### 147 **Inference of demographic history**

148 To investigate historical demographic changes in the northern cardinal we used the Pairwise  
149 Sequential Markovian Coalescent (PSMC) model (Li and Durbin 2011) based on the diploid  
150 whole-genome sequence to reconstruct the population history. We generated consensus  
151 sequences for all autosomes using SAMtools' (v1.5; Li et al. 2009) *mpileup* command and  
152 the *vcf2fq* command from *vcfutils.pl*. We applied filters for base quality and mapping quality  
153 below 30. The settings for the PSMC atomic time intervals were "4+30\*2+4+6+10". 100  
154 bootstraps were used to compute the variance in estimates of  $N_e$ . To convert inferred  
155 population sizes and times to numbers of individuals and years, respectively, we used the

156 estimate of mutation rate of  $3.44e-09$  per site per generation from the medium ground finch  
157 (*Geospiza fortis*, Thraupidae, a closely related passerine clade) (Nadachowska-Brzyska et al.  
158 2015). We estimated the generation time of the northern cardinal as age of sexual maturity  
159 multiplied by a factor of two (Nadachowska-Brzyska et al. 2015), yielding a generation time  
160 of 2 years.

161

#### 162 **Data availability (Data will be available later prior to publication)**

163 Data from all sequencing runs and final genome assembly are available from NCBI  
164 (BioProject number will be provided later). Short-fragment and mate-pair libraries are also  
165 available from the NCBI SRA (number to be provided later).

166

#### 167 **Results and Discussion**

##### 168 **Genome assembly and evaluation**

169 We generated 703,754,970 total reads from two different sequencing libraries, including  
170 335,713,090 reads from the fragment library and 368,041,880 reads from the mate-pair  
171 library. The genome size estimated by AllPaths-LG from k-mers was 1.1 Gb (Table 1). The  
172 sequence coverage estimated was  $\sim 59x$ . The assembly consisted of 32,783 contigs and 4,762  
173 scaffolds. The largest scaffold was 19.7 Mb. The contig N50 was 114.4 kb and the scaffold  
174 N50 was 3.6 Mb (Table 1). The number of contigs per Mb was 31.4 and the number of  
175 scaffolds per Mb was 4.6. The average GC content of the assembly was 42.1%. BUSCO  
176 scores (Simão et al. 2015) suggest high completeness of the genome, with 93.5% of single-  
177 copy orthologs for birds identified (Table 2). The genome contiguity and completeness is  
178 better than most genomes presented in Jarvis et al. (2014) and Grayson et al. (2017).

179

##### 180 **Candidate non-coding regulatory regions of CYP2J19**



181 The CYP2J19 gene was identified on scaffold 100 of the *C. cardinalis* genome, flanked by  
182 CYP2J40 and NFIA genes (Fig. 2), an arrangement consistent with other species (e.g. Lopes  
183 et al. 2016; Mundy et al. 2016). The length of the CYP2J19 gene in *C. cardinalis* is 8925 bp,  
184 comprising 9 exons. We identified 26 CNEEs in the CYP2J19 gene, 24 CNEEs within ~6 kb  
185 upstream and 1 CNEE within ~6 kb downstream of the gene. Of those 51 CNEEs, 10 CNEEs  
186 in CYP2J19 and 7 CNEEs upstream of the gene are at least 50 bp in length.

187 Three intronic insertions, as well as one non-coding region upstream and one  
188 downstream of the gene were found to be present only in passerine species (Fig. 3). In  
189 addition, we identified unique insertions of large genomic regions in the two passerine  
190 species in our alignment with red carotenoid coloration, i.e. *C. cardinalis* and *T. guttata*. A  
191 unique 5920 bp insertion is present 339 bp upstream of the CYP2J19 gene in *C. cardinalis*  
192 (Fig. 4a). There is a 11322 bp insertion downstream of CYP2J19 in *T. guttata* comprising the  
193 CYP2J19B gene (Fig. 4b; Mundy et al. 2016) that is not present in *C. cardinalis*. The most  
194 similar sequence to the *C. cardinalis* upstream insertion identified by blasting (~84%  
195 identity, 25% query cover) is a sequence annotated as “RNA-directed DNA polymerase from  
196 mobile element jockey-like” in the American crow (*Corvus brachyrhynchos*) genome  
197 assembly (Zhang et al. 2014), suggesting that the insertion may contain a non-long terminal  
198 repeat (non-LTR) retrotransposon (Ivanov et al. 1991). An endogenous retroviral insertion  
199 located upstream of the aromatase gene is proposed to be the mechanism of gene activation  
200 that lead to the henny feathers phenotype in chickens (Matsumine et al. 1991). The possibility  
201 that the upstream retrovirus may promote CYP2J19 gene activation is worth more  
202 investigation.

203 We discovered a total of 25 motifs clustered in a ~1.7 kb region in the unique  
204 insertion sequence of *C. cardinalis* (Fig. 5a). Fourteen TFs are predicted for the 5 identified  
205 motif types (Fig. S1, Table 3). No significant GO term appears to be associated with motifs

206 1–3 and 5, whereas significant GO terms associated with motif 3 predict molecular functions  
207 of GTP binding and hexose transmembrane transporter activity. Three predicted TFs (i.e.  
208 Sp1, SREBF, and RREB1; Table 3) are associated with androgen regulation of gene  
209 expression.

210 *Cis*-regulatory elements play a crucial role in the development of sexually dimorphic  
211 traits (Williams and Carroll 2009). In birds, sexual dimorphism is strongly affected by steroid  
212 sex hormones (Kimball 2006). Sex hormones such as androgen may indirectly influence the  
213 expression of androgen-regulated genes, through binding to transcription factors that interact  
214 with regulatory elements such as enhancer and cause sex-biased gene expression, which leads  
215 to sex-specific phenotypes (Coyne et al. 2008; Mank 2009). Whereas male plumage appears  
216 to be testosterone-dependent in passerines (Kimball 2006), the molecular mechanisms  
217 controlling sex-biased gene expression and development of sexually dimorphic traits in birds  
218 is largely unknown (Kraaijeveld 2019; Gazda et al. in press). In this study, we identified  
219 potential TFs that may regulate the expression of the red plumage color gene CYP2J19.  
220 Many CYP450s are differentially expressed between the sexes (Rinn and Snyder 2005).  
221 Some of our TFs predicted to interact with the insertion unique to *C. cardinalis* are androgen-  
222 regulated, including Sp1, which is involved in the androgen activation of the vas deferens  
223 protein promoter in mice (Darne et al. 1997) and sterol regulatory element-binding factor  
224 (SREBF, aka SREBP), which is involved in androgen-regulated activation mechanisms of  
225 target genes (Heemers et al. 2006). Another predicted TF, the zinc finger protein Ras-  
226 responsive element binding protein (RREB1), is a co-regulator of androgen receptor (AR)  
227 and plays a role in androgenic signaling by affecting AR-dependent transcription  
228 (Mukhopadhyay et al. 2007). The interaction between androgens, the implicated TFs and  
229 their corresponding binding motifs may underlie the development of sexually dimorphic red  
230 plumage color in *C. cardinalis*. In addition, the TF nuclear factor erythroid-derived 2-like 2

231 (Nfe2l2, also known as nuclear factor erythroid 2-related factor 2, Nrf2) is predicted to bind  
232 to all but motif 2 (Fig. 5). The activity of Nrf2 is influenced by changes in oxidative stress,  
233 and it regulates the expression of numerous antioxidant proteins (Schultz et al. 2014).  
234 Because the production of red ketocarotenoids via CYP2J19 is sensitive to oxidative state  
235 (Lopes et al. 2016), this oxidation-dependent TF suggests a possible link between production  
236 of red pigments and the oxidative stress faced by the organism, which may reflect an  
237 association between red carotenoid coloration and individual quality (Hill and Johnson 2012).

238         The above non-exonic regions in and outside of the CYP2J19 gene are candidates of  
239 regulatory elements responsible for modulating red carotenoid-based coloration in passerines  
240 and *C. cardinalis*. Noncoding regulatory regions may be subject to less pleiotropic constraint  
241 than protein-coding genes (Carroll et al. 2008), and many CNEEs act as enhancers with  
242 regulatory functions (Seki et al. 2017; Sackton et al. 2019). In particular, the large non-exonic  
243 region rich with TF-binding motifs upstream of the *C. cardinalis* CYP2J19 gene may play a  
244 role in the strong sexual dichromatism and striking bright red male color in this species. The  
245 mechanism of plumage color development and sexual dichromatism, and the regulatory role  
246 of those genomic regions identified in this study are fruitful areas for future research.

247

#### 248 **Demographic historic of *C. cardinalis***

249 The PSMC analysis (Fig. 6) suggested a demographic history of *C. cardinalis* characterized  
250 by a fluctuation in the historic effective population size between 100,000–250,000 around  
251 ~2,000,000 years ago (ya). The population was at ~160,000 at the beginning of Pleistocene  
252 epoch at 2,580,000 ya, then decreased to 110,000 in ~800,000 ya, and increased to ~230,000  
253 at the beginning of the Last Glacial Period around 115,000 ya. The population started to  
254 declined again after the beginning of the Last Glacial Period (LGP). The decrease in effective  
255 population size observed at the beginning of Pleistocene might be due to the divergence of *C.*

256 *cardinalis* into different subspecies (Provost et al. 2018). The population decline after the  
257 start of the LGP is consistent with the ecological niche model that indicates a dramatic range  
258 reduction for *C. cardinalis* during the LGP (Smith et al. 2011).

259

## 260 **Conclusion**

261 We used small-fragment and mate-pair libraries Illumina sequencing data to generate a draft  
262 genome assembly of the northern cardinal, *C. cardinalis*. Comparative analyses revealed  
263 conserved non-exonic regions unique to the CYP2J19 gene in passerines and in *C. cardinalis*,  
264 which may play a role in the regulation of red carotenoid-based plumage coloration. The  
265 motifs discovered in the lineage-specific upstream region of CYP2J19 in *C. cardinalis*  
266 suggest potential *cis*-regulatory mechanisms underlying sexual dichromatism. The assembled  
267 *C. cardinalis* genome is therefore useful for studying genotype–phenotype associations and  
268 sexual dichromatism in this species. As one of the first genome sequenced in Cardinalidae,  
269 and the highest in quality, it will also be an important resource for the comparative study of  
270 plumage color evolution in passerines and birds in general.

271

## 272 **Acknowledgments**

273 We would like to thank Jonathan Schmitt and Katherine Eldridge for collecting and preparing  
274 the specimen and tissues. We thank Clarence Stewart for sharing the northern cardinal photo.  
275 This research was supported by research funds through Harvard University. The computing  
276 resources for this study were provided by the Odyssey cluster supported by the FAS Division  
277 of Science, Research Computing Group at Harvard University.

278

## 279 **Literature Cited**

- 280 Anderson, M. and R. Conner. 1985. Northern cardinal song in three forest habitats in eastern  
281 Texas. *The Wilson Bulletin*:436–449.
- 282 Bailey, T., M. Boden, F. Buske, M. Frith, C. Grant, L. Clementi, J. Ren, W. Li, and W.  
283 Noble. 2009. MEME SUITE: tools for motif discovery and searching. *Nucleic Acids*  
284 *Res.* 37:W202–W208.
- 285 Bailey, T. and C. Elkan. 1994. Fitting a mixture model by expectation maximization to  
286 discover motifs in biopolymers. *Proceedings of the Second International Conference*  
287 *on Intelligent Systems for Molecular Biology*, AAAI Press, Menlo Park,  
288 California:28–36.
- 289 Bailey, T., J. Johnson, C. Grant, and W. Noble. 2015. The MEME suite. *Nucleic Acids Res.*  
290 43:W39–W49.
- 291 Bolger, A., M. Lohse, and B. Usadel. 2014. Trimmomatic: a flexible trimmer for Illumina  
292 sequence data. *Bioinformatics* 30:2114–2120.
- 293 Buske, F., M. Bodén, D. Bauer, and T. Bailey. 2010. Assigning roles to DNA regulatory  
294 motifs using comparative genomics. *Bioinformatics* 26:860–866.
- 295 Carroll, S., B. Prud'homme, and N. Gompel. 2008. Regulating evolution. *Sci. Am.* 298:60–  
296 67.
- 297 Coyne, J., E. Kay, and S. Pruett-Jones. 2008. The genetic basis of sexual dimorphism in  
298 birds. *Evolution: International Journal of Organic Evolution* 62:214–219.
- 299 Darne, C., L. Morel, F. Claessens, M. Manin, S. Fabre, G. Veyssiere, W. Rombauts, and C.  
300 Jean. 1997. Ubiquitous transcription factors NF1 and Sp1 are involved in the  
301 androgen activation of the mouse vas deferens protein promoter. *Mol. Cell.*  
302 *Endocrinol.* 132:13–23.

- 303 DeVries, M. and J. Jawor. 2013. Natural variation in circulating testosterone does not predict  
304 nestling provisioning rates in the northern cardinal, *Cardinalis cardinalis*. *Anim.*  
305 *Behav.* 85:957–965.
- 306 Edgar, R. 2004. MUSCLE: multiple sequence alignment with high accuracy and high  
307 throughput. *Nucleic Acids Res.* 32:1792–1797.
- 308 Fridolfsson, A. K. and H. Ellegren. 1999. A simple and universal method for molecular  
309 sexing of non-ratite birds. *J. Avian Biol.* 30:116–121.
- 310 Friedman, N., K. McGraw, and K. Omland. 2014. Evolution of carotenoid pigmentation in  
311 caciques and meadowlarks (Icteridae): repeated gains of red plumage coloration by  
312 carotenoid C4-oxygenation. *Evolution* 68:791–801.
- 313 Funk, E. and S. Taylor. 2019. High-throughput sequencing is revealing genetic associations  
314 with avian plumage color. *The Auk* 136:ukz048.
- 315 Gazda, M. A., P. M. Araújo, R. J. Lopes, M. B. Toomey, P. Andrade, S. Afonso, C. Marques,  
316 L. Nunes, P. Pereira, S. Trigo, G. E. Hill, J. C. Corbo, and M. Carneiro. in press. A  
317 genetic mechanism for sexual dichromatism in birds. *Science*.
- 318 Gazda, M. A., M. B. Toomey, P. M. Araújo, R. J. Lopes, S. Afonso, C. A. Myers, K. Serres,  
319 P. D. Kiser, G. E. Hill, J. C. Corbo, and M. Carneiro. 2020. Genetic basis of de novo  
320 appearance of carotenoid ornamentation in bare parts of canaries. *Mol. Biol. Evol.*  
321 37:1317–1328.
- 322 Gnerre, S., I. MacCallum, D. Przybylski, F. Ribeiro, J. Burton, B. Walker, T. Sharpe, G. Hall,  
323 T. Shea, S. Sykes, and A. Berlin. 2011. High-quality draft assemblies of mammalian  
324 genomes from massively parallel sequence data. *Proceedings of the National*  
325 *Academy of Sciences* 108:1513–1518.
- 326 Grayson, P., S. Y. W. Sin, T. B. Sackton, and S. V. Edwards. 2017. Comparative genomics as  
327 a foundation for evo-devo studies in birds. Humana Press, New York, NY.

- 328 Gupta, S., J. Stamatoyannopoulos, T. Bailey, and W. Noble. 2007. Quantifying similarity  
329 between motifs. *Genome Biology* 8:R24.
- 330 Heemers, H., G. Verhoeven, and J. Swinnen. 2006. Androgen activation of the sterol  
331 regulatory element-binding protein pathway: Current insights. *Mol. Endocrinol.*  
332 20:2265–2277.
- 333 Hill, G. and J. Johnson. 2012. The vitamin A–redox hypothesis: a biochemical basis for  
334 honest signaling via carotenoid pigmentation. *The American Naturalist* 180:E127–  
335 E150.
- 336 Ivanov, V., A. Melnikov, A. Siunov, I. Fodor, and Y. Ilyin. 1991. Authentic reverse  
337 transcriptase is coded by jockey, a mobile *Drosophila* element related to mammalian  
338 LINEs. *The EMBO journal* 10:2489–2495.
- 339 Jarvis, E., S. Mirarab, A. Aberer, B. Li, P. Houde, C. Li, S. Ho, B. Faircloth, B. Nabholz, J.  
340 Howard, and A. Suh. 2014. Whole-genome analyses resolve early branches in the tree  
341 of life of modern birds. *Science* 346:1320–1331.
- 342 Jawor, J., S. Linville, S. Beall, and R. Breitwisch. 2003. Assortative mating by multiple  
343 ornaments in northern cardinals (*Cardinalis cardinalis*). *Behav. Ecol.* 14:515–520.
- 344 Jawor, J. and S. MacDougall-Shackleton. 2008. Seasonal and sex-related variation in song  
345 control nuclei in a species with near-monomorphic song, the northern cardinal.  
346 *Neurosci. Lett.* 443:169–173.
- 347 Kearse, M., R. Moir, A. Wilson, S. Stones-Havas, M. Cheung, S. Sturrock, S. Buxton, A.  
348 Cooper, S. Markowitz, C. Duran, and T. Thierer. 2012. Geneious Basic: an integrated  
349 and extendable desktop software platform for the organization and analysis of  
350 sequence data. *Bioinformatics* 28:1647–1649.
- 351 Kim, K., B. Jackson, H. Zhang, D. Toews, S. Taylor, E. Greig, I. Lovette, M. Liu, A.  
352 Davison, S. Griffith, and K. Zeng. 2019. Genetics and evidence for balancing

- 353 selection of a sex-linked colour polymorphism in a songbird. *Nature Communications*  
354 10:1–11.
- 355 Kimball, R. 2006. Hormonal control of coloration. Pp. 431–468 *in* G. Hill, and K. McGraw,  
356 eds. *Bird coloration. I. Mechanisms and measurements*. Harvard University Press,  
357 Cambridge, MA.
- 358 Kraaijeveld, K. 2019. Genetic architecture of novel ornamental traits and the establishment of  
359 sexual dimorphism: insights from domestic birds. *Journal of Ornithology* 160:861–  
360 868.
- 361 Li, H. and R. Durbin. 2011. Inference of human population history from individual whole-  
362 genome sequences. *Nature* 475:493–496.
- 363 Li, H., B. Handsaker, A. Wysoker, T. Fennell, J. Ruan, N. Homer, G. Marth, G. Abecasis,  
364 and R. Durbin. 2009. The sequence alignment/map format and SAMtools.  
365 *Bioinformatics* 25:2078–2079.
- 366 Linville, S. and R. Breitwisch. 1997. Carotenoid availability and plumage coloration in a wild  
367 population of northern cardinals. *The Auk* 114:796–800.
- 368 Linville, S., R. Breitwisch, and A. Schilling. 1998. Plumage brightness as an indicator of  
369 parental care in northern cardinals. *Anim. Behav.* 55:119–127.
- 370 Lopes, R. J., J. D. Johnson, M. B. Toomey, M. S. Ferreira, P. M. Araujo, J. Melo-Ferreira, L.  
371 Andersson, G. E. Hill, J. C. Corbo, and M. Carneiro. 2016. Genetic basis for red  
372 coloration in birds. *Curr. Biol.* 26:1427–1434.
- 373 Mank, J. 2009. Sex chromosomes and the evolution of sexual dimorphism: lessons from the  
374 genome. *The American Naturalist* 173:141–150.
- 375 Matsumine, H., M. A. Herbst, S. H. Ou, J. D. Wilson, and M. J. McPhaul. 1991. Aromatase  
376 mRNA in the extragonadal tissues of chickens with the henny-feathering trait is  
377 derived from a distinctive promoter structure that contains a segment of a retroviral



- 378 long terminal repeat. Functional organization of the Sebright, Leghorn, and Campine  
379 aromatase genes. *J. Biol. Chem.* 266:19900–19907.
- 380 McGraw, K., G. Hill, and R. Parker. 2003. Carotenoid pigments in a mutant cardinal:  
381 implications for the genetic and enzymatic control mechanisms of carotenoid  
382 metabolism in birds. *The Condor* 105:587–592.
- 383 Mukhopadhyay, N., B. Cinar, L. Mukhopadhyay, M. Lutchman, A. Ferdinand, J. Kim, L.  
384 Chung, R. Adam, S. Ray, A. Leiter, and J. Richie. 2007. The zinc finger protein ras-  
385 responsive element binding protein-1 is a coregulator of the androgen receptor:  
386 implications for the role of the Ras pathway in enhancing androgenic signaling in  
387 prostate cancer. *Mol. Endocrinol.* 21:2056–2070.
- 388 Mundy, N. I., J. Stapley, C. Bennison, R. Tucker, H. Twyman, K. W. Kim, T. Burke, T. R.  
389 Birkhead, S. Andersson, and J. Slate. 2016. Red carotenoid coloration in the zebra  
390 finch is controlled by a cytochrome P450 gene cluster. *Curr. Biol.* 26:1435–1440.
- 391 Nadachowska-Brzyska, K., C. Li, L. Smeds, G. Zhang, and H. Ellegren. 2015. Temporal  
392 dynamics of avian populations during Pleistocene revealed by whole-genome  
393 sequences. *Curr. Biol.* 25:1375–1380.
- 394 Paynter, R. J. 1970. Subfamily Emberizinae. Museum of Comparative Zoology, Cambridge,  
395 MA, USA.
- 396 Provost, K., W. M. III, and B. Smith. 2018. Genomic divergence in allopatric Northern  
397 Cardinals of the North American warm deserts is linked to behavioral differentiation.  
398 *Ecology and Evolution* 8:12456–12478.
- 399 Rinn, J. and M. Snyder. 2005. Sexual dimorphism in mammalian gene expression. *Trends*  
400 *Genet.* 21:298–305.

- 401 Sackton, T., P. Grayson, A. Cloutier, Z. Hu, J. Liu, N. Wheeler, P. Gardner, J. Clarke, A.  
402 Baker, M. Clamp, and S. Edwards. 2019. Convergent regulatory evolution and loss of  
403 flight in paleognathous birds. *Science* 364:74–78.
- 404 Schultz, M., S. Hagan, A. Datta, Y. Zhang, M. Freeman, S. Sikka, A. Abdel-Mageed, and D.  
405 Mondal. 2014. Nrf1 and Nrf2 transcription factors regulate androgen receptor  
406 transactivation in prostate cancer cells. *PloS One* 9.
- 407 Seki, R., C. Li, Q. Fang, S. Hayashi, S. Egawa, J. Hu, L. Xu, H. Pan, M. Kondo, T. Sato, and  
408 H. Matsubara. 2017. Functional roles of Aves class-specific cis-regulatory elements  
409 on macroevolution of bird-specific features. *Nature Communications* 8:1–14.
- 410 Simão, F. A., R. M. Waterhouse, P. Ioannidis, E. V. Kriventseva, and E. M. Zdobnov. 2015.  
411 BUSCO: assessing genome assembly and annotation completeness with single-copy  
412 orthologs. *Bioinformatics* 31:3210–3212.
- 413 Smith, B., P. Escalante, B. Baños, A. Navarro-Sigüenza, S. Rohwer, and J. Klicka. 2011. The  
414 role of historical and contemporary processes on phylogeographic structure and  
415 genetic diversity in the Northern Cardinal, *Cardinalis cardinalis*. *BMC Evol. Biol.*  
416 11:136.
- 417 Toomey, M., C. Marques, P. Andrade, P. Araújo, S. Sabatino, M. Gazda, S. Afonso, R.  
418 Lopes, J. Corbo, and M. Carneiro. 2018. A non-coding region near Follistatin controls  
419 head colour polymorphism in the Gouldian finch. *Proceedings of the Royal Society B*  
420 285:20181788.
- 421 Twyman, H., S. Andersson, and N. Mundy. 2018a. Evolution of CYP2J19, a gene involved in  
422 colour vision and red coloration in birds: positive selection in the face of conservation  
423 and pleiotropy. *BMC Evol. Biol.* 18:22.

- 424 Twyman, H., M. Prager, N. I. Mundy, and S. Andersson. 2018b. Expression of a carotenoid-  
425 modifying gene and evolution of red coloration in weaverbirds (Ploceidae). *Mol.*  
426 *Ecol.* 27:449–458.
- 427 Twyman, H., N. Valenzuela, R. Litterman, S. Andersson, and N. I. Mundy. 2016. Seeing red  
428 to being red: conserved genetic mechanism for red cone oil droplets and co-option for  
429 red coloration in birds and turtles. *Proc. R. Soc. Lond. B Biol. Sci.* 283:20161208.
- 430 Williams, T. and S. Carroll. 2009. Genetic and molecular insights into the development and  
431 evolution of sexual dimorphism. *Nat. Rev. Genet.* 10:797–804.
- 432 Wright, S. and H. Fokidis. 2016. Sources of variation in plasma corticosterone and  
433 dehydroepiandrosterone in the male northern cardinal (*Cardinalis cardinalis*): II.  
434 Effects of urbanization, food supplementation and social stress. *Gen. Comp.*  
435 *Endocrinol.* 235:201–209.
- 436 Yamaguchi, A. 1998. A sexually dimorphic learned birdsong in the Northern Cardinal. *The*  
437 *Condor* 100:504–511.
- 438 Zhang, G., C. Li, Q. Li, B. Li, D. Larkin, C. Lee, J. Storz, A. Antunes, M. Greenwold, R.  
439 Meredith, and A. Ödeen. 2014. Comparative genomics reveals insights into avian  
440 genome evolution and adaptation. *Science* 346:1311–1320.
- 441

442 **Tables**

443

444

445 **Table 1** *De novo* assembly metrics for northern cardinal genome

| Metric                             | Value         |
|------------------------------------|---------------|
| Estimated genome size              | 1.10 Gb       |
| %GC content                        | 42.1          |
| Total depth of coverage            | 59x           |
| Total contig length (bp)           | 1,019,501,986 |
| Total scaffold length (bp, gapped) | 1,044,184,327 |
| Number of contigs                  | 32,783        |
| Contig N50                         | 114.4 kb      |
| Number of scaffolds                | 4,762         |
| Scaffold N50 (with gaps)           | 3.6 Mb        |
| Largest scaffold                   | 19.7 Mb       |

446

447

448

449 **Table 2** Output from BUSCO analyses to assess genome completeness by searching for

450 single-copy orthologs from aves dataset

|                                 | Aves | %    |
|---------------------------------|------|------|
| Complete BUSCOs                 | 4642 | 94.4 |
| Complete and single-copy BUSCOs | 4596 | 93.5 |
| Complete and duplicated BUSCOs  | 46   | 0.9  |
| Fragmented BUSCOs               | 167  | 3.4  |
| Missing BUSCOs                  | 106  | 2.2  |
| Total BUSCO groups searched     | 4915 |      |

451

452

453

454

455

456

457

458

459

460

461

462  
463  
464

**Table 3** Transcription factors (TFs) predicted for the 5 motifs.

| Motif no. | TF name <sup>a</sup>   | <i>p</i> -value        |
|-----------|------------------------|------------------------|
| 1         | KLF13                  | $6.32 \times 10^{-04}$ |
|           | <b>Nfe2l2</b>          | $2.15 \times 10^{-03}$ |
|           | <b>SP1</b>             | $3.62 \times 10^{-03}$ |
|           | <b>SREBF1</b>          | $4.81 \times 10^{-03}$ |
|           | <b>Ascl2 secondary</b> | $5.18 \times 10^{-03}$ |
| 2         | SOX8 DBD5              | $3.99 \times 10^{-03}$ |
| 3         | <b>Nfe2l2</b>          | $3.72 \times 10^{-04}$ |
|           | MAF NFE2               | $2.78 \times 10^{-03}$ |
|           | <b>Bach1 Mafk</b>      | $3.14 \times 10^{-03}$ |
|           | Zfp128 primary         | $3.40 \times 10^{-03}$ |
|           | E2F7                   | $5.52 \times 10^{-03}$ |
| 4         | <b>Nfe2l2</b>          | $1.05 \times 10^{-03}$ |
|           | <b>RREB1</b>           | $2.86 \times 10^{-03}$ |
|           | <b>SP1</b>             | $4.73 \times 10^{-03}$ |
|           | <b>Bach1 Mafk</b>      | $4.91 \times 10^{-03}$ |
| 5         | <b>SP1</b>             | $2.04 \times 10^{-03}$ |
|           | <b>Ascl2 secondary</b> | $2.06 \times 10^{-03}$ |
|           | <b>SREBF1</b>          | $2.18 \times 10^{-03}$ |
|           | EBF1                   | $3.42 \times 10^{-03}$ |
|           | <b>Nfe2l2</b>          | $3.95 \times 10^{-03}$ |
|           | KLF16                  | $4.83 \times 10^{-03}$ |
|           | SP3                    | $4.83 \times 10^{-03}$ |
|           | <b>RREB1</b>           | $4.96 \times 10^{-03}$ |

<sup>a</sup> Bold names indicates TFs predicted for more than one motif.

465  
466  
467  
468  
469

470 **Figures**

471

472

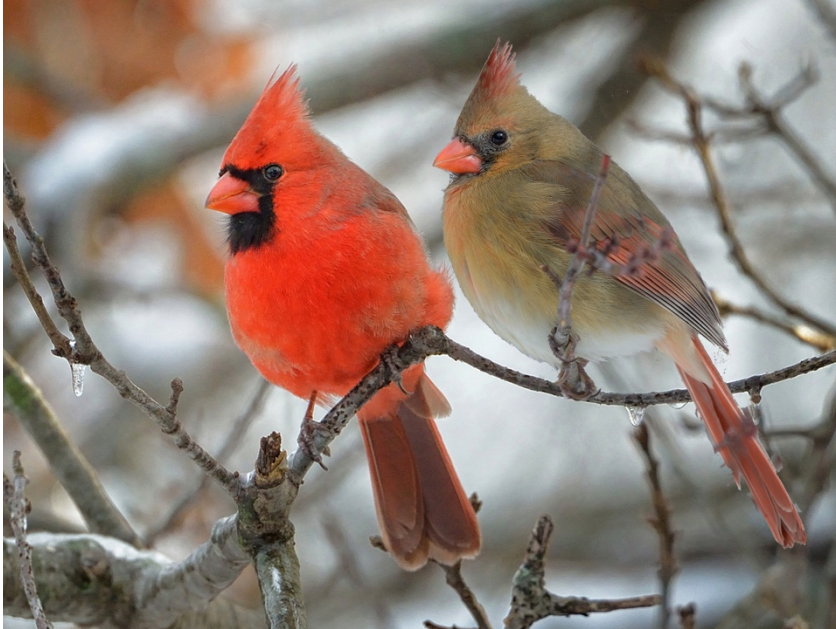

473

474 **Figure 1** A pair of northern cardinals, a common, sexually dichromatic passerine bird. The  
475 adult male (left) has bright red plumage whereas the adult female (right) is primarily tan in  
476 color. Photo © Clarence Stewart.

477

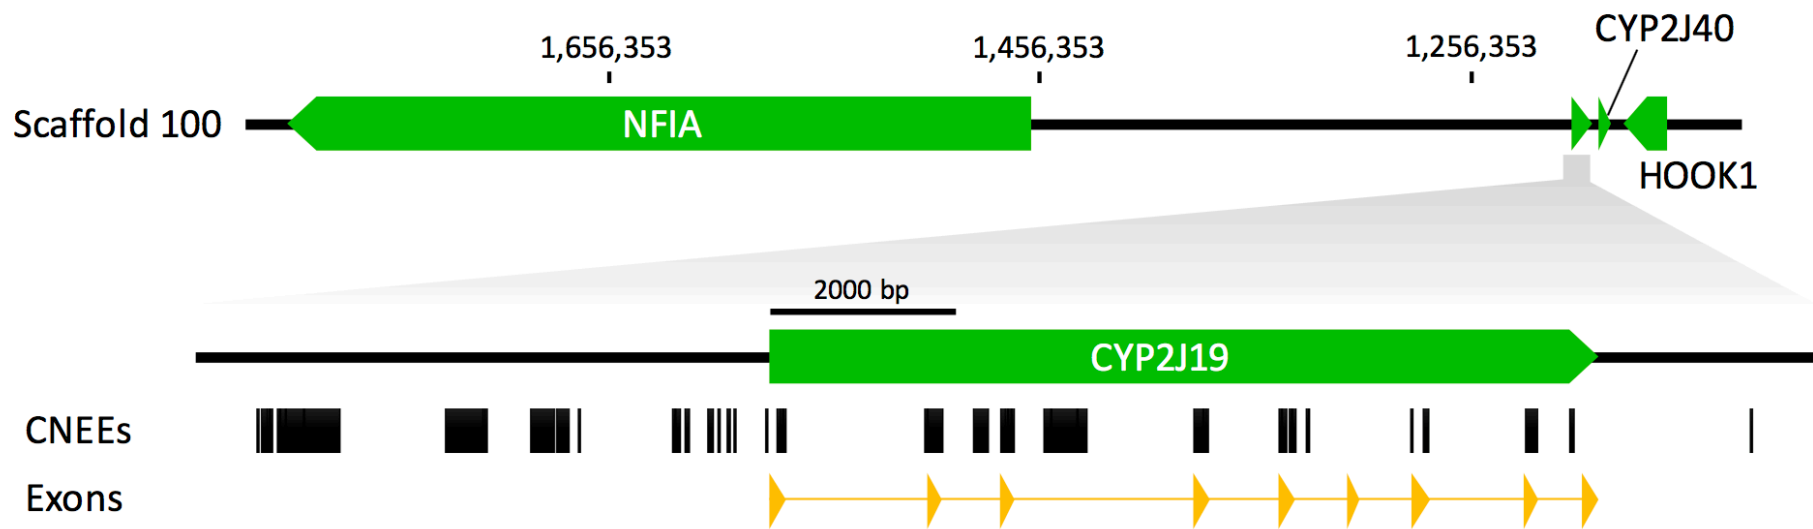

**Figure 2** Annotation of the CYP2J19 region in scaffold 100 of the northern cardinal genome. The CYP2J19 gene is flanked by the NFIA and CYP2J40 genes as in other passerines. Conserved non-exonic elements (CNEEs) are shown in black boxes. Exons of the CYP2J19 gene are in yellow triangles.

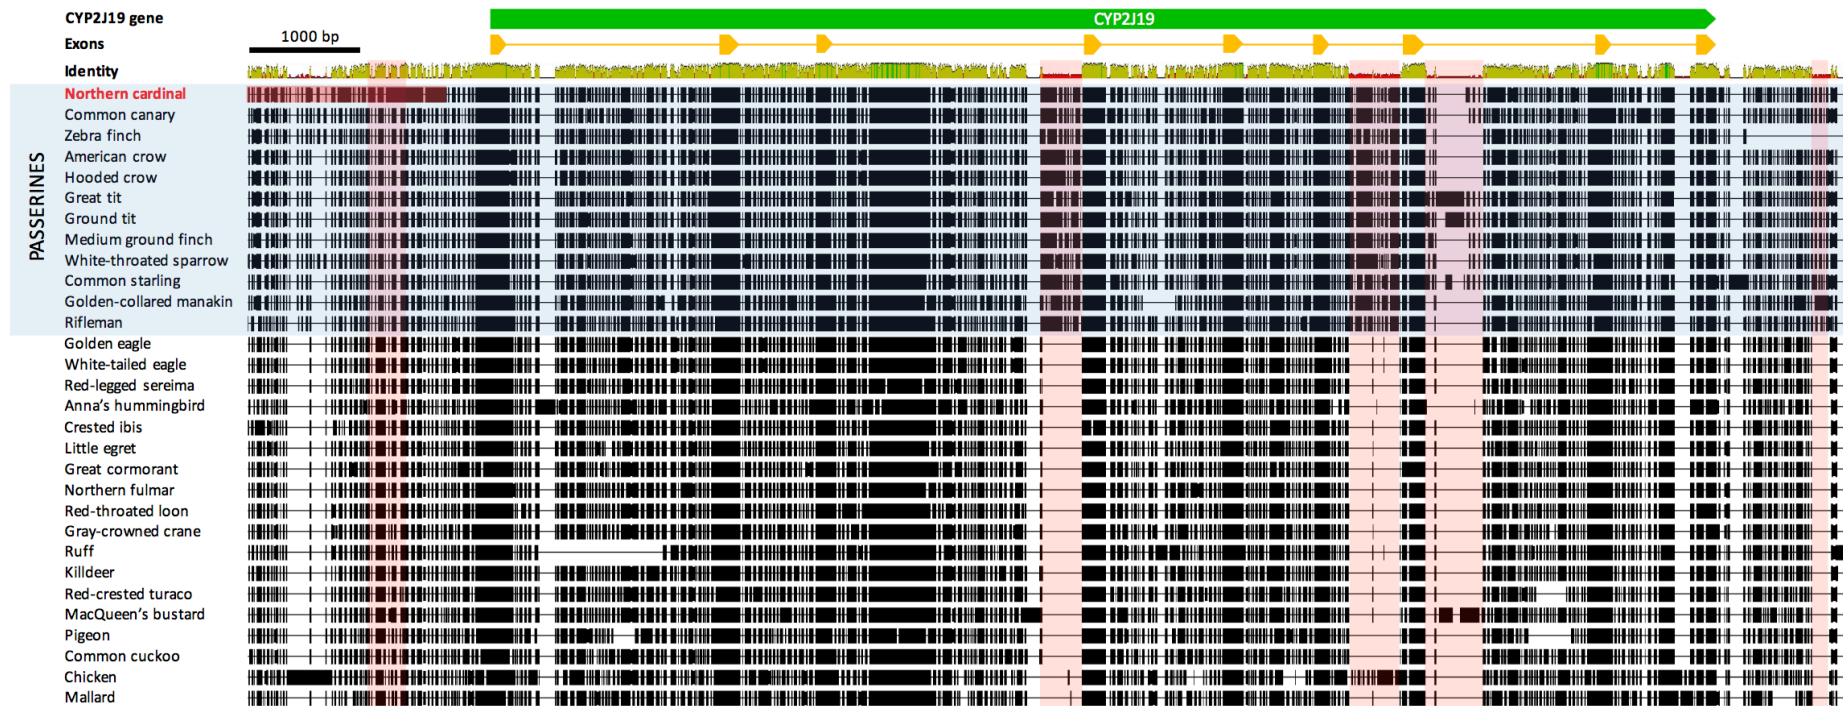

**Figure 3** Multiple sequence alignment of the CYP2J19 gene in birds, with red highlighted areas showing regions present in passerines but not other birds. Exons of the CYP2J19 gene are depicted as yellow triangles. The dark red highlighted region upstream of the CYP2J19 gene in the northern cardinal is different from other passerines (see figure 5).



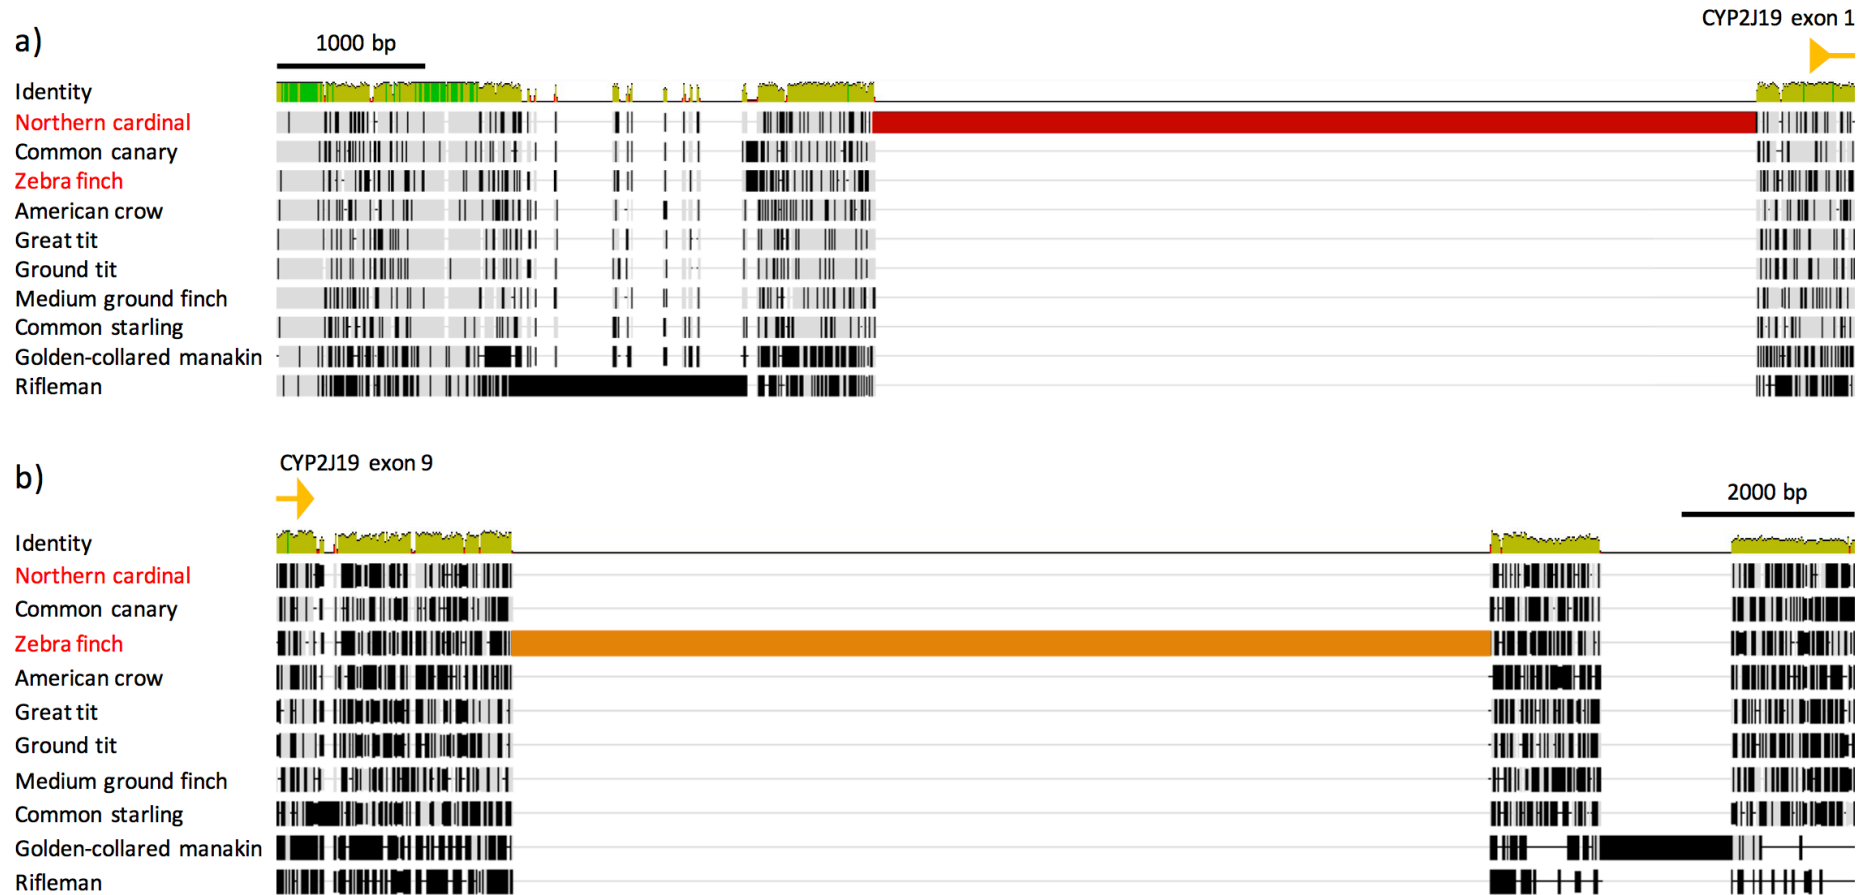

**Figure 4** Multiple sequence alignment of (a) upstream and (b) downstream regions of the CYP2J19 gene in passerines. A large insertion upstream of CYP2J19 unique to the northern cardinal is highlighted in red. The insertion of a large region downstream of CYP2J19 highlighted in orange in the zebra finch indicates the CYP2J19B gene in the CYP2J2-like cluster in this species. The names of species possessing red carotenoid coloration (i.e. northern cardinal and zebra finch) are in red. Exons of the CYP2J19 gene are depicted as yellow triangles.

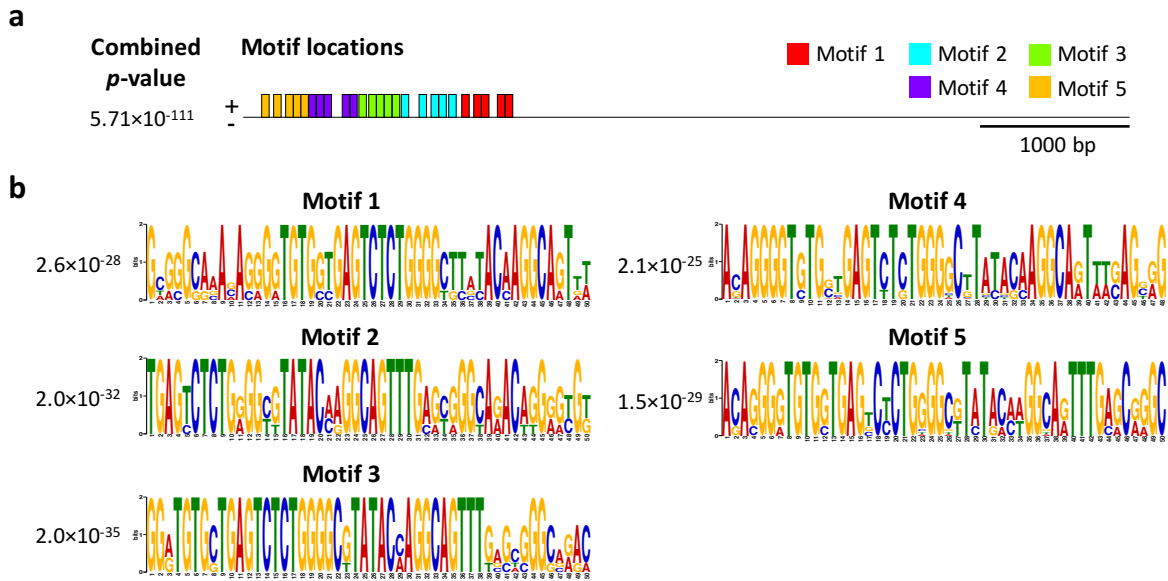

**Figure 5** Identification of potential DNA motifs in the unique 5920 bp insertion upstream of the CYP2J19 gene in *C. cardinalis*. (a) Locations of 25 motifs identified and their distribution in the insertion sequence. Sites on the positive (+) strand are shown above the line. Scale is shown below the sequence. (b) Logos of five motifs with statistically significant e-values provided next to the logos.

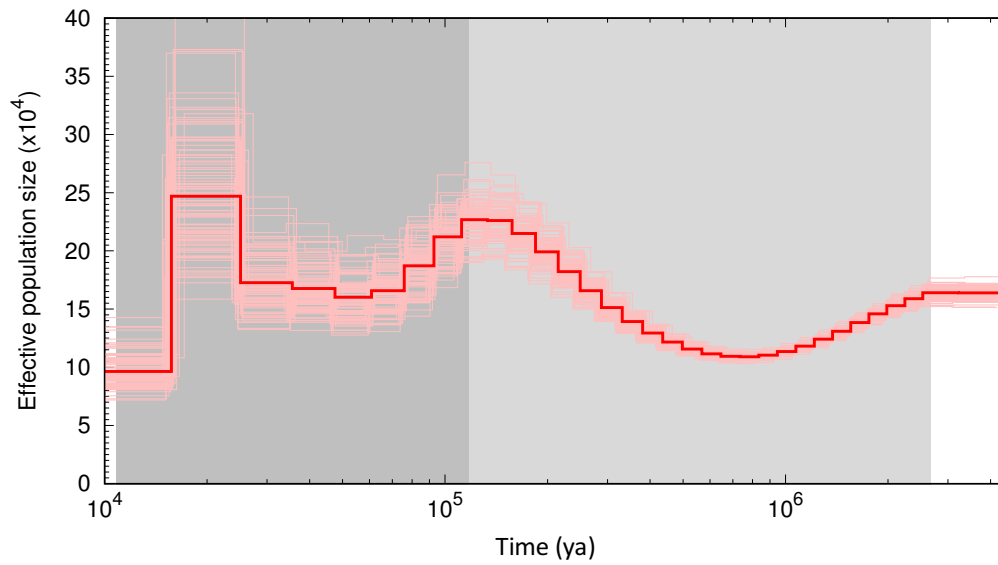

**Figure 6** Demographic history of the northern cardinal inferred using PSMC. Bold red line is the median effective population size estimate, whereas thin lines are 100 individual bootstrap replicates. The light and dark grey areas indicate the Pleistocene epoch and Last Glacial Period, respectively.

## Supplementary Information

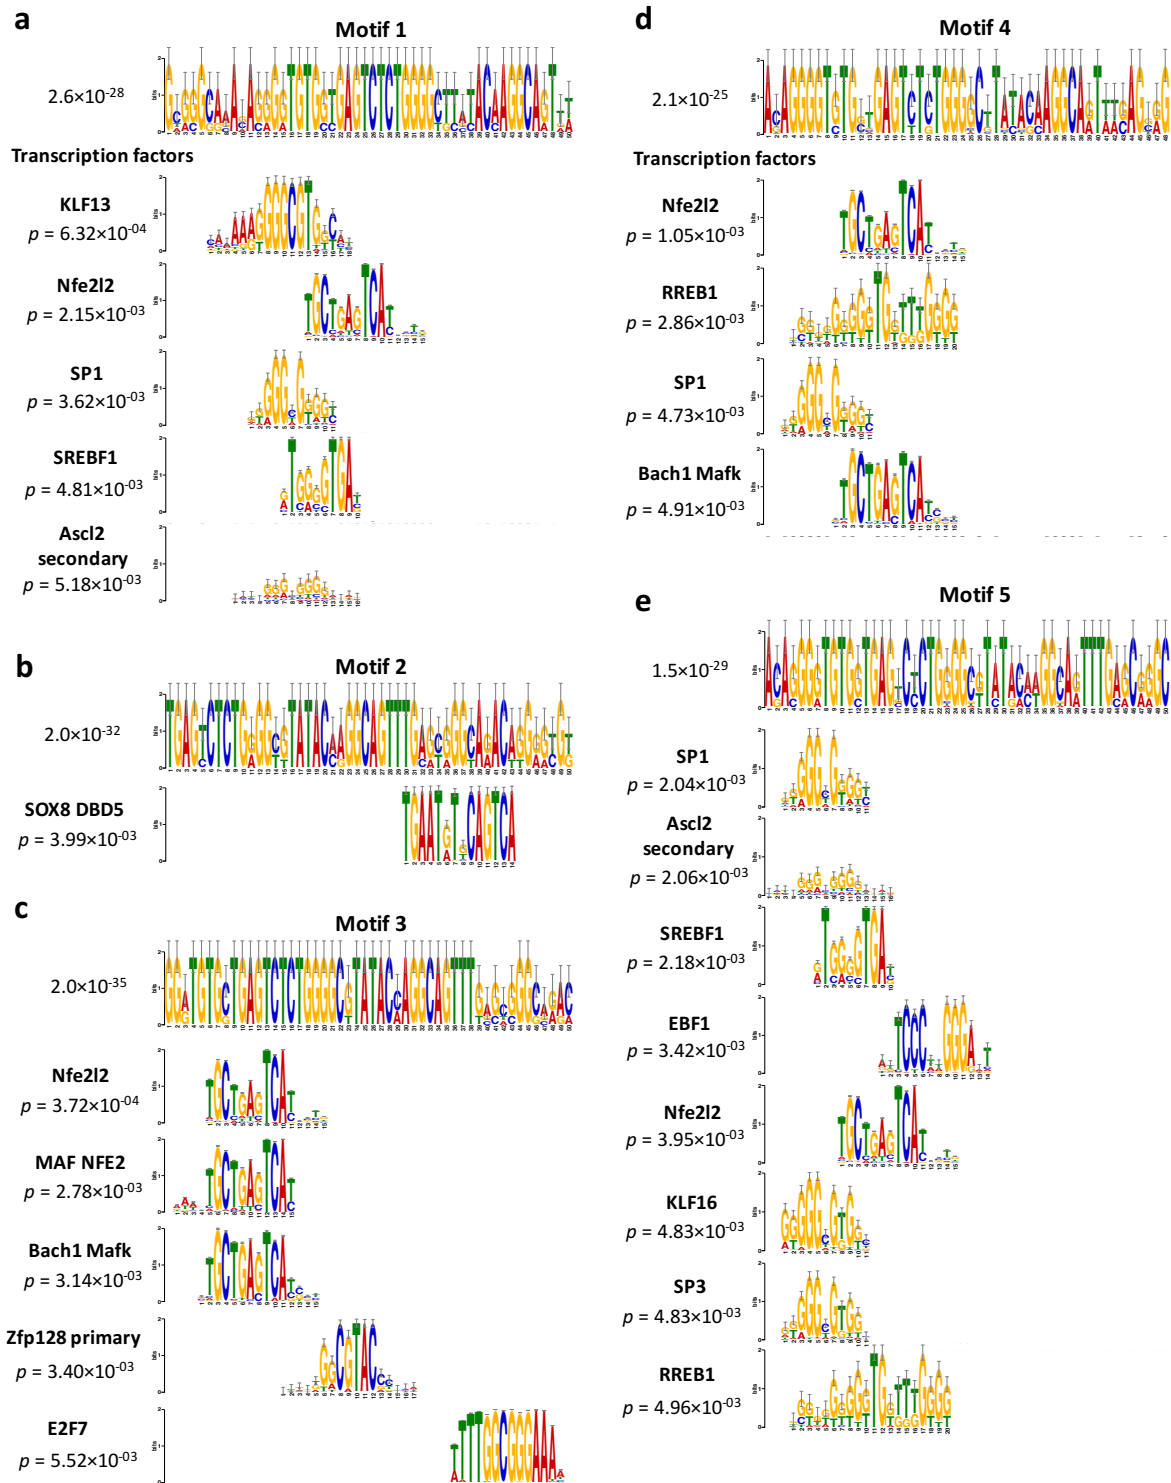

**Figure S1** Identification of potential binding transcription factors in the unique 5920 bp insertion upstream of the CYP2J19 gene in *C. cardinalis*. (a–e) Logos of five motifs with statistically significant e-values provided next to the logos. Transcription factors predicted for the 5 motifs are shown below the query motifs.
